# Supplementary material
Source: publisher site journal article supplement (https://www.spandidos-publications.com/6067/downloadSupplementary)

Figure S1. Expression level of TRPC6 among different groups. (A) Relative protein levels of TRPC6 in the heart from the Sham + Vehicle, Sham + Larixyl, TAC + Vehicle and TAC +Larixyl groups at 4 weeks after TAC (n=3/group). (B) Relative protein levels of TRPC6 of the cells from the Con + Vehicle, Ang II + Vehicle, Ang II + Larixyl and Ang II + Larixyl + MYH groups (n=3/group). Data are presented as the mean  $\pm$  SD. The homogeneity of variance test for the data did not reveal significant differences, therefore, the data were analyzed using one-way ANOVA. \*\*\*P<0.001 vs. the Sham + Vehicle group; #P<0.05 vs. the TAC + Vehicle group; \$\$\$P<0.001 vs. the Con + Vehicle group; &&P<0.01 vs. the Ang II + Vehicle group.

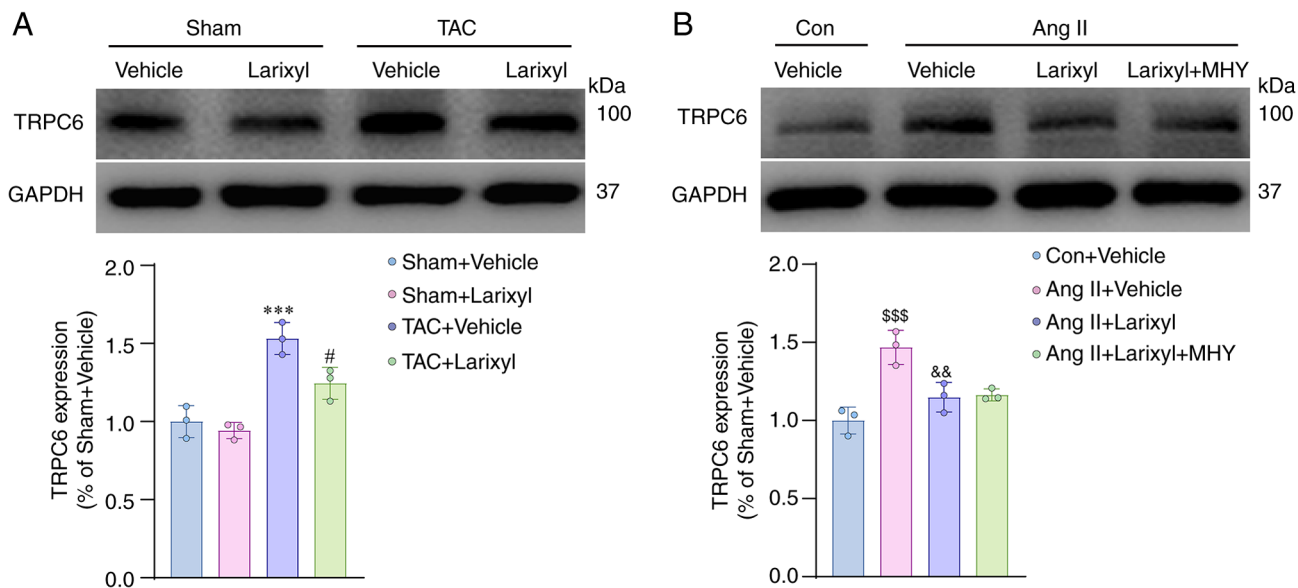

Supplement: Supplementary file 1 [file downloadSupplementary]
